# Supplementary material for: Assessment of Bioactive Profile of Sorghum Brans under the Effect of Growing Conditions and Nitrogen Fertilization
Source: MDPI journal article supplement (doi:10.3390/agriculture13040760), 2023-03-25
Supplement: s1 [file s1]

## Supplementary materials

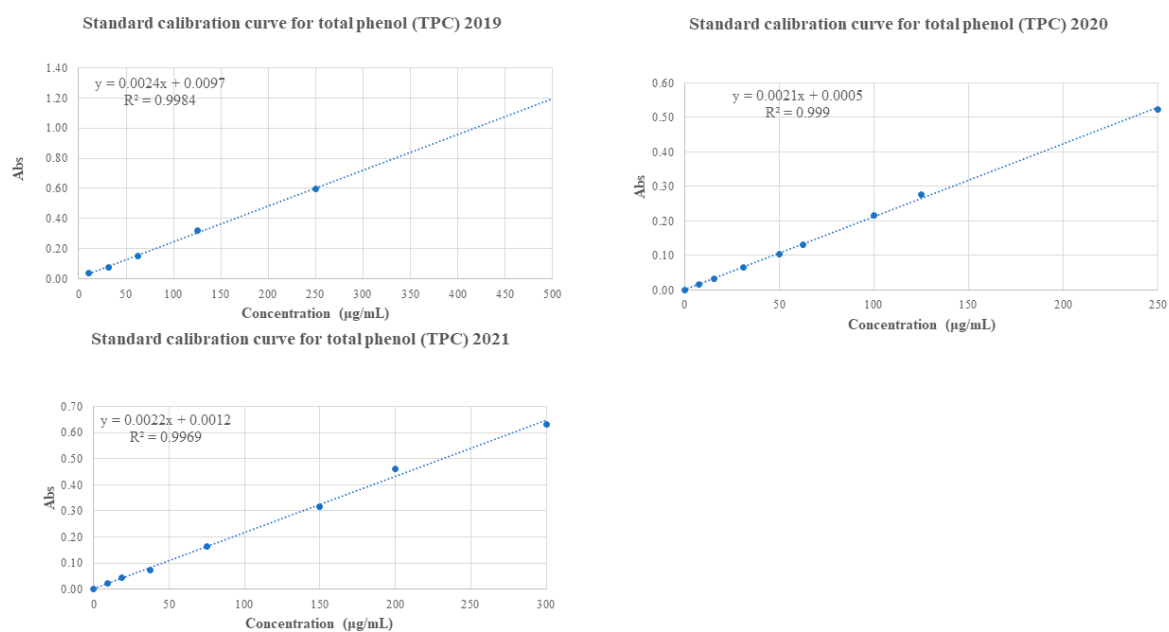

**Figure S1:** Standard calibration curves of total phenol assays 2019–2021

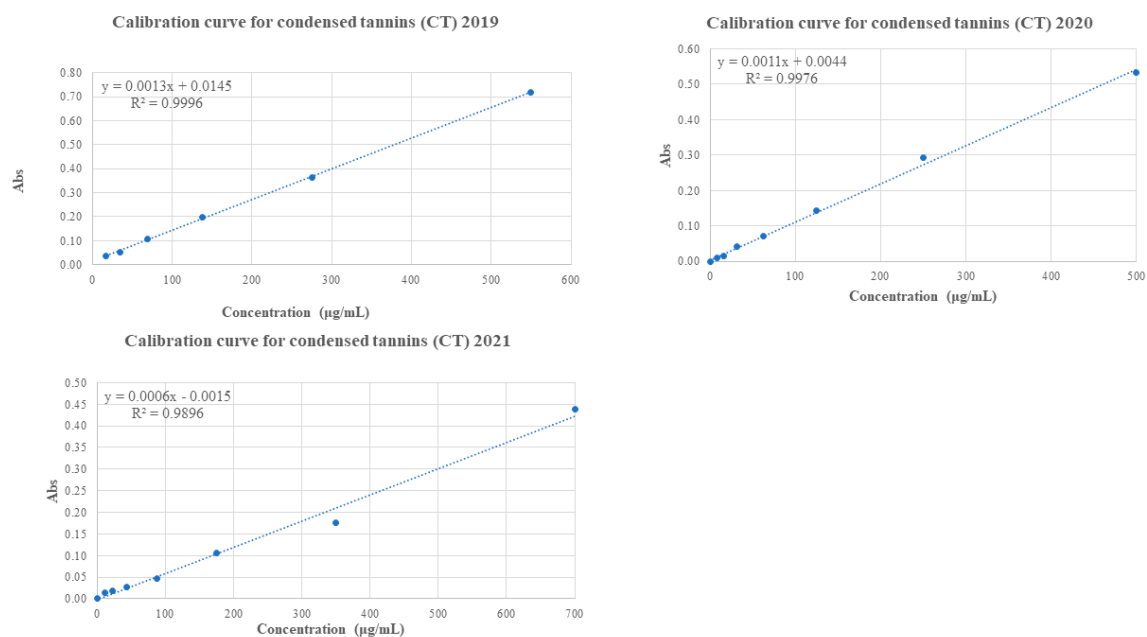

**Figure S2:** Standard calibration curves of condensed tannin assays 2019–2021

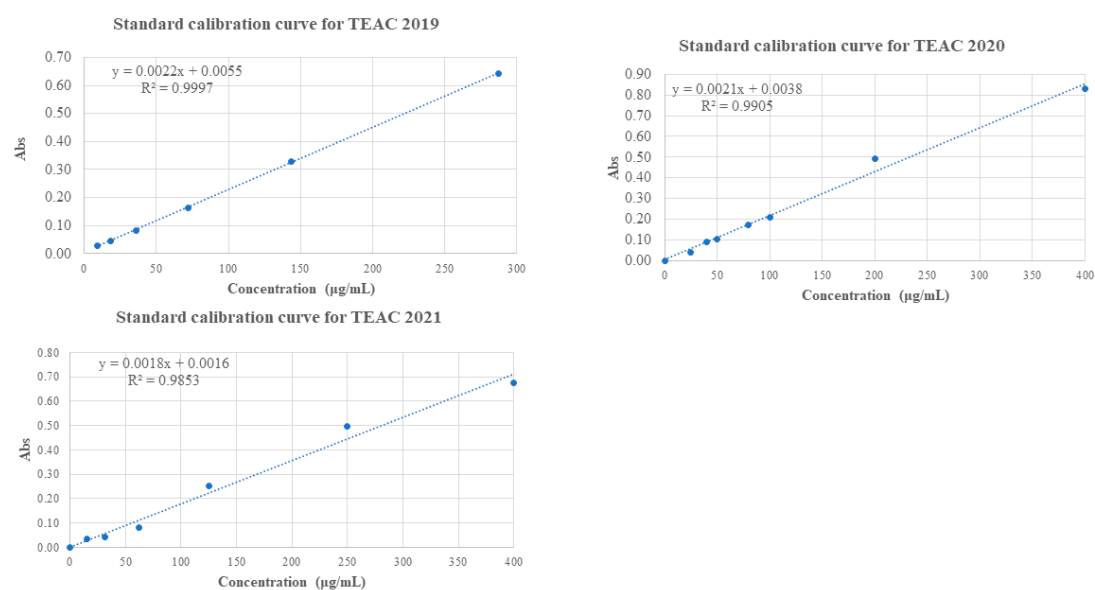

**Figure S3:** Standard calibration curves of TEAC 2019–2021

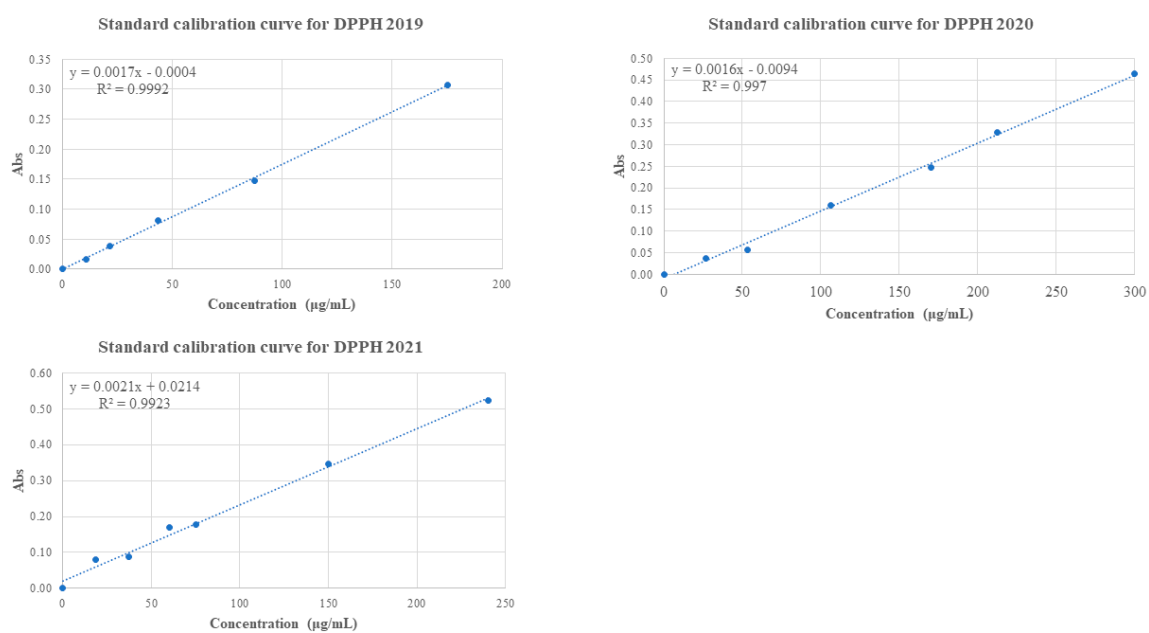

**Figure S4:** Standard calibration curves of DPPH 2019–2021

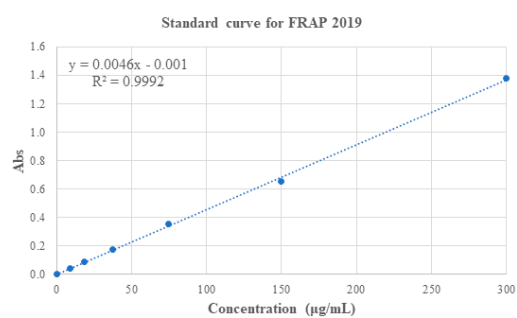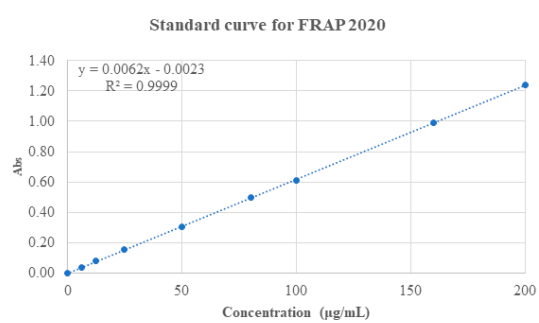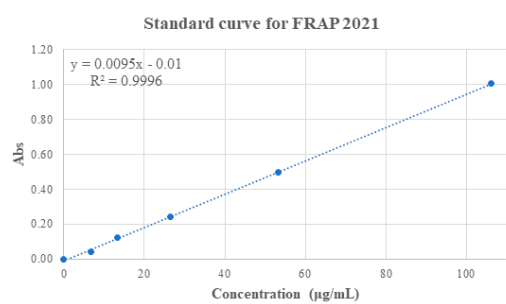

Figure S5: Standard calibration curves of FRAP 2019–2021

**Table S1:** Mean square values from analysis of variance on the effect of harvest year and nitrogen treatment

| TPC              |              |                 |              |               |                |                      |
|------------------|--------------|-----------------|--------------|---------------|----------------|----------------------|
|                  | <u>Zádor</u> | <u>Alföldi1</u> | <u>Foehn</u> | <u>Albita</u> | <u>Albanus</u> | <u>Farmsugro 180</u> |
| Treatment        | 54457.963**  | 48.221          | 110.97       | 457.566*      | 50.883         | 519.042              |
| Year             | 53462.286**  | 1351878.354***  | 7896.399***  | 1285.443***   | 2313.959***    | 9291.371***          |
| Year x Treatment | 25698.715    | 2266.887        | 36.937       | 549.26*       | 38.474         | 956.303*             |
| Error            | 4994.762     | 8142.444        | 261.981      | 85.379        | 98.185         | 215.767              |

---

| CTC              |              |                 |              |               |                |                      |
|------------------|--------------|-----------------|--------------|---------------|----------------|----------------------|
|                  | <u>Zádor</u> | <u>Alföldi1</u> | <u>Foehn</u> | <u>Albita</u> | <u>Albanus</u> | <u>Farmsugro 180</u> |
| Treatment        | 0.422        | 19.972          | 0.141        | 0.031         | 0              | 0.19                 |
| Year             | 11.665**     | 2701.896***     | 7.851***     | 4.895***      | 1.296***       | 14.051***            |
| Year x Treatment | 5.883*       | 25.903          | 0.076        | 0.047         | 0.037          | 0.129                |
| Error            | 1.033        | 10.264          | 0.033        | 0.026         | 0.018          | 0.076                |

---

| TEAC             |              |                 |              |               |                |                      |
|------------------|--------------|-----------------|--------------|---------------|----------------|----------------------|
|                  | <u>Zádor</u> | <u>Alföldi1</u> | <u>Foehn</u> | <u>Albita</u> | <u>Albanus</u> | <u>Farmsugro 180</u> |
| Treatment        | 26.931       | 145.983         | 0.479        | 0.385         | 7.822          | 3.822*               |
| Year             | 1368.856**   | 280.885         | 26.082***    | 20.095***     | 8.053**        | 18.594***            |
| Year x Treatment | 1368.856*    | 51.793          | 2.223        | 0.685         | 0.259**        | 7.669**              |
| Error            | 103.253      | 135.8           | 0.969        | 0.491         | 0.695          | 0.52                 |

---

| DPPH             |              |                 |              |               |                |                      |
|------------------|--------------|-----------------|--------------|---------------|----------------|----------------------|
|                  | <u>Zádor</u> | <u>Alföldi1</u> | <u>Foehn</u> | <u>Albita</u> | <u>Albanus</u> | <u>Farmsugro 180</u> |
| Treatment        | 70.431       | 504.897         | 2.229        | 0.652         | 6.099**        | 0.563                |
| Year             | 315.22       | 33196.605***    | 24.913***    | 0.37          | 3.815**        | 140.905***           |
| Year x Treatment | 396.949      | 97.198          | 0.022        | 0.006         | 0.911          | 5.736*               |
| Error            | 68.491       | 429.25          | 0.834        | 0.181         | 0.367          | 0.911                |

---

| FRAP             |              |                 |              |               |                |                      |
|------------------|--------------|-----------------|--------------|---------------|----------------|----------------------|
|                  | <u>Zádor</u> | <u>Alföldi1</u> | <u>Foehn</u> | <u>Albita</u> | <u>Albanus</u> | <u>Farmsugro 180</u> |
| Treatment        | 19.682       | 11.498          | 7.909*       | 3.766         | 0.24           | 1.626                |
| Year             | 459.254***   | 5.137           | 93.237***    | 276.752***    | 71.527***      | 49.821***            |
| Year x Treatment | 0.284        | 9.175           | 2.717        | 3.201*        | 1.554          | 0.778                |
| Error            | 7.951        | 3.145           | 1.101        | 0.82          | 0.592          | 0.768                |

Note: Stars after each value means statistically significant differences.  $p < 0.05$  (\*),  $p < 0.01$  (\*\*),  $p < 0.001$  (\*\*\*)
